# Supplementary material
Source: publisher figshare collection journal article supplement (https://acs.figshare.com/ndownloader/files/4143853)
Supplement: Supplementary file 1 [file 4143853]

# Supporting Information

## **Recognition and One-pot Extraction of Right- and Left-handed Semiconducting Single-Walled Carbon Nanotube Enantiomers Using Fluorene-Binaphthol Chiral Copolymers**

Kojiro Akazaki,<sup>a</sup> Fumiyuki Toshimitsu,<sup>a</sup> Hiroaki Ozawa,<sup>a</sup> Tsuyohiko Fujigaya,<sup>a</sup> and Naotoshi Nakashima<sup>\*,a,b,c</sup>

<sup>a</sup>Department of Applied Chemistry, Graduate School of Engineering, Kyushu University, Fukuoka 819-0395, Japan

<sup>b</sup>International Institute for Carbon-Neutral Energy Research (WPI-I2CNER), Kyushu University

<sup>c</sup>Japan Science and Technology Agency (JST), Core Research of Evolutional Science & Technology (CREST), 5 Sanbancho, Chiyoda-ku, Tokyo 102-0075, Japan

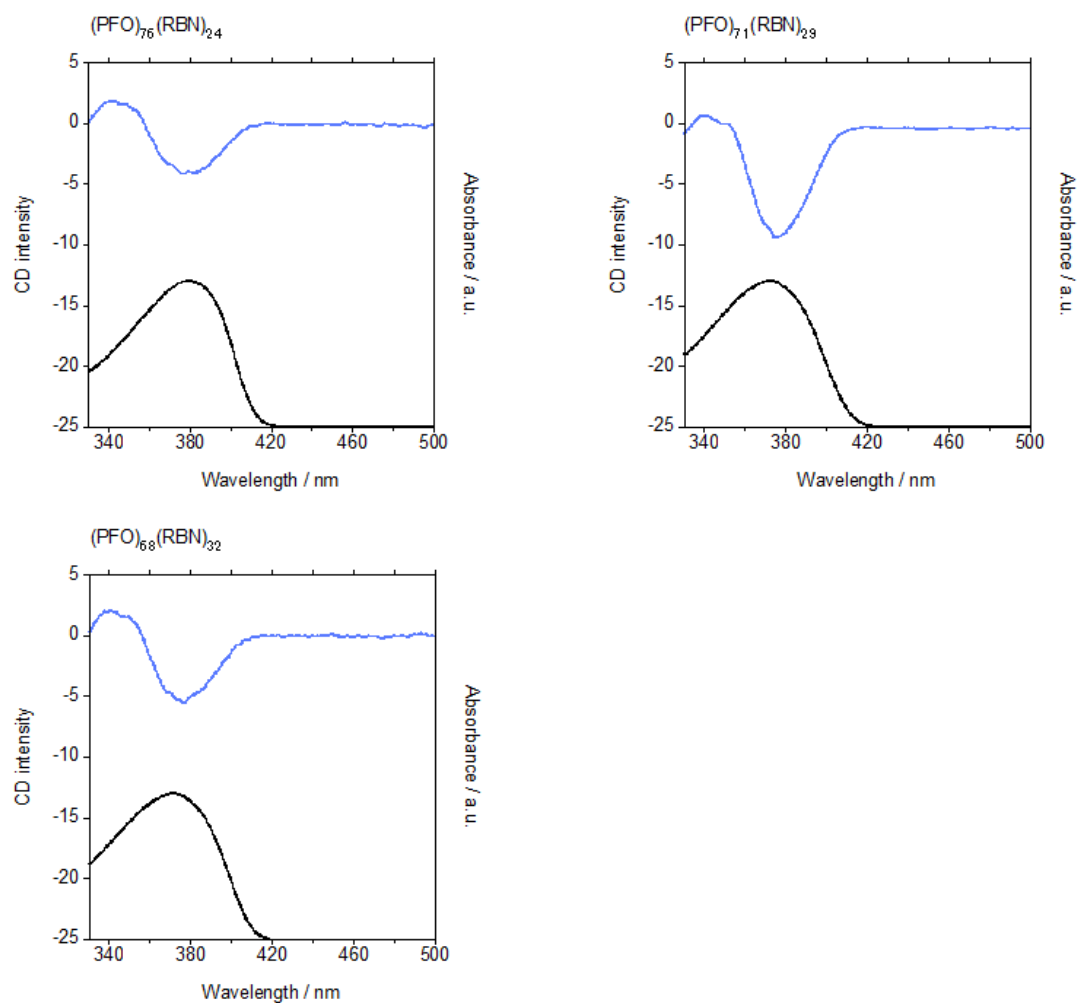

**Figure S1.** UV-vis absorption (black) and CD (blue) spectra of  $(\text{PFO})_x(\text{RBN})_y$  ( $x = y = 76: 24, 71: 29$  and  $68: 32$ ). CD spectra are normalized based on the absorbance intensity of the copolymers at maximum wavelength.

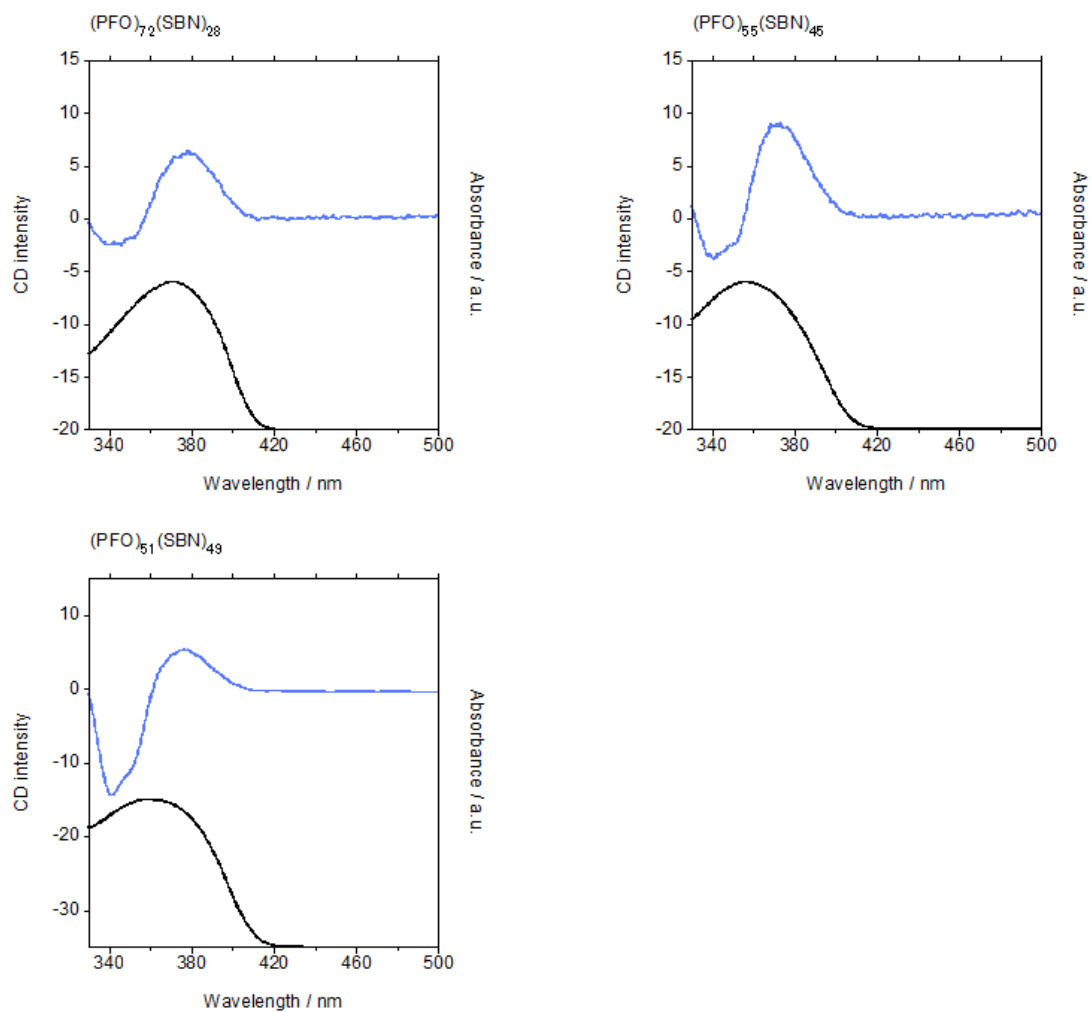

**Figure S2.** UV-vis absorption (black lines) and CD (blue lines) spectra of  $(\text{PFO})_x(\text{SBN})_y$  ( $x$ :  $y$ = 72: 28, 55: 45 and 51: 49). The CD spectra are normalized based on the absorbance intensity of the copolymers at their maximum wavelength.

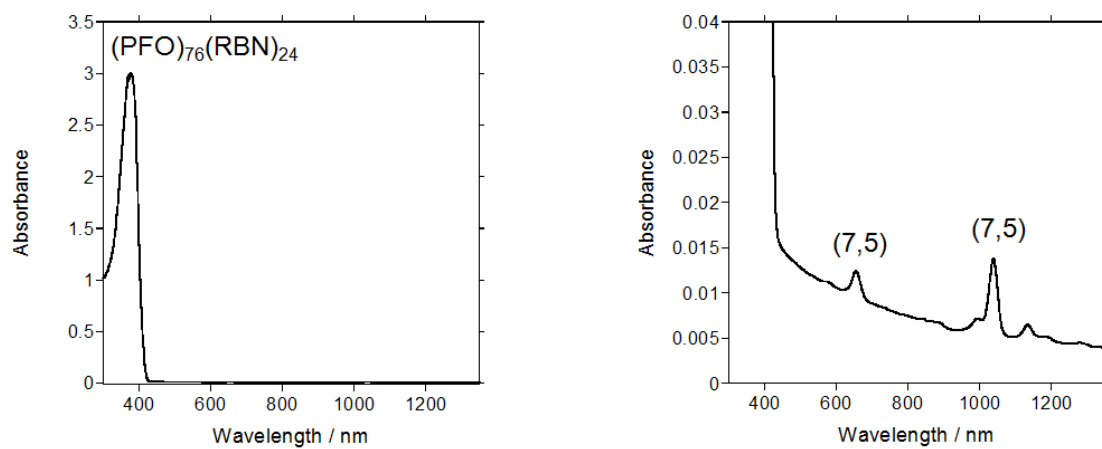

**Figure S3.** Absorption spectra of SWNTs solubilized by  $(\text{PFO})_{76}(\text{RBN})_{24}$  (1 mm cell).

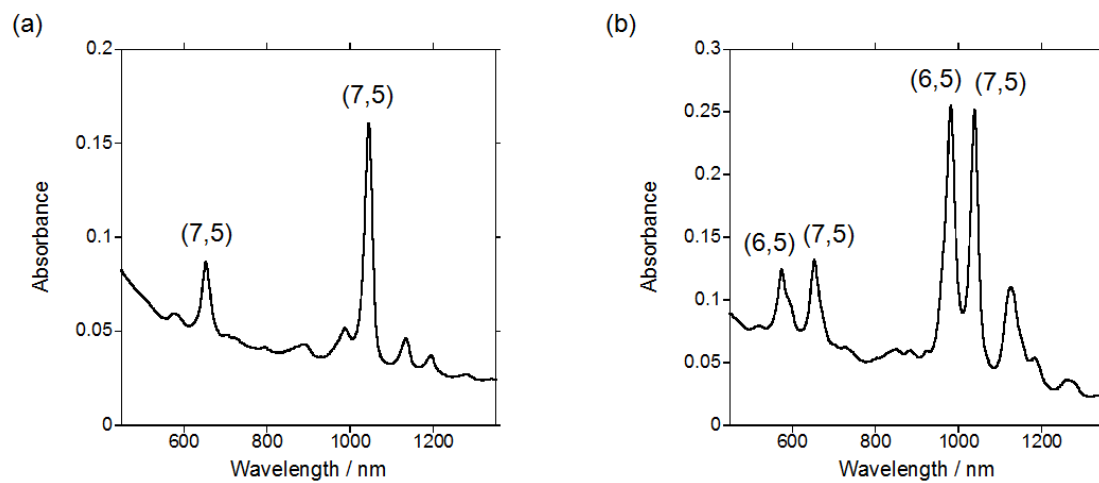

**Figure S4.** Absorption spectra of SWNTs solubilized by **PFO** (a) and **(PFO)<sub>61</sub>(RBN)<sub>39</sub>** (b).

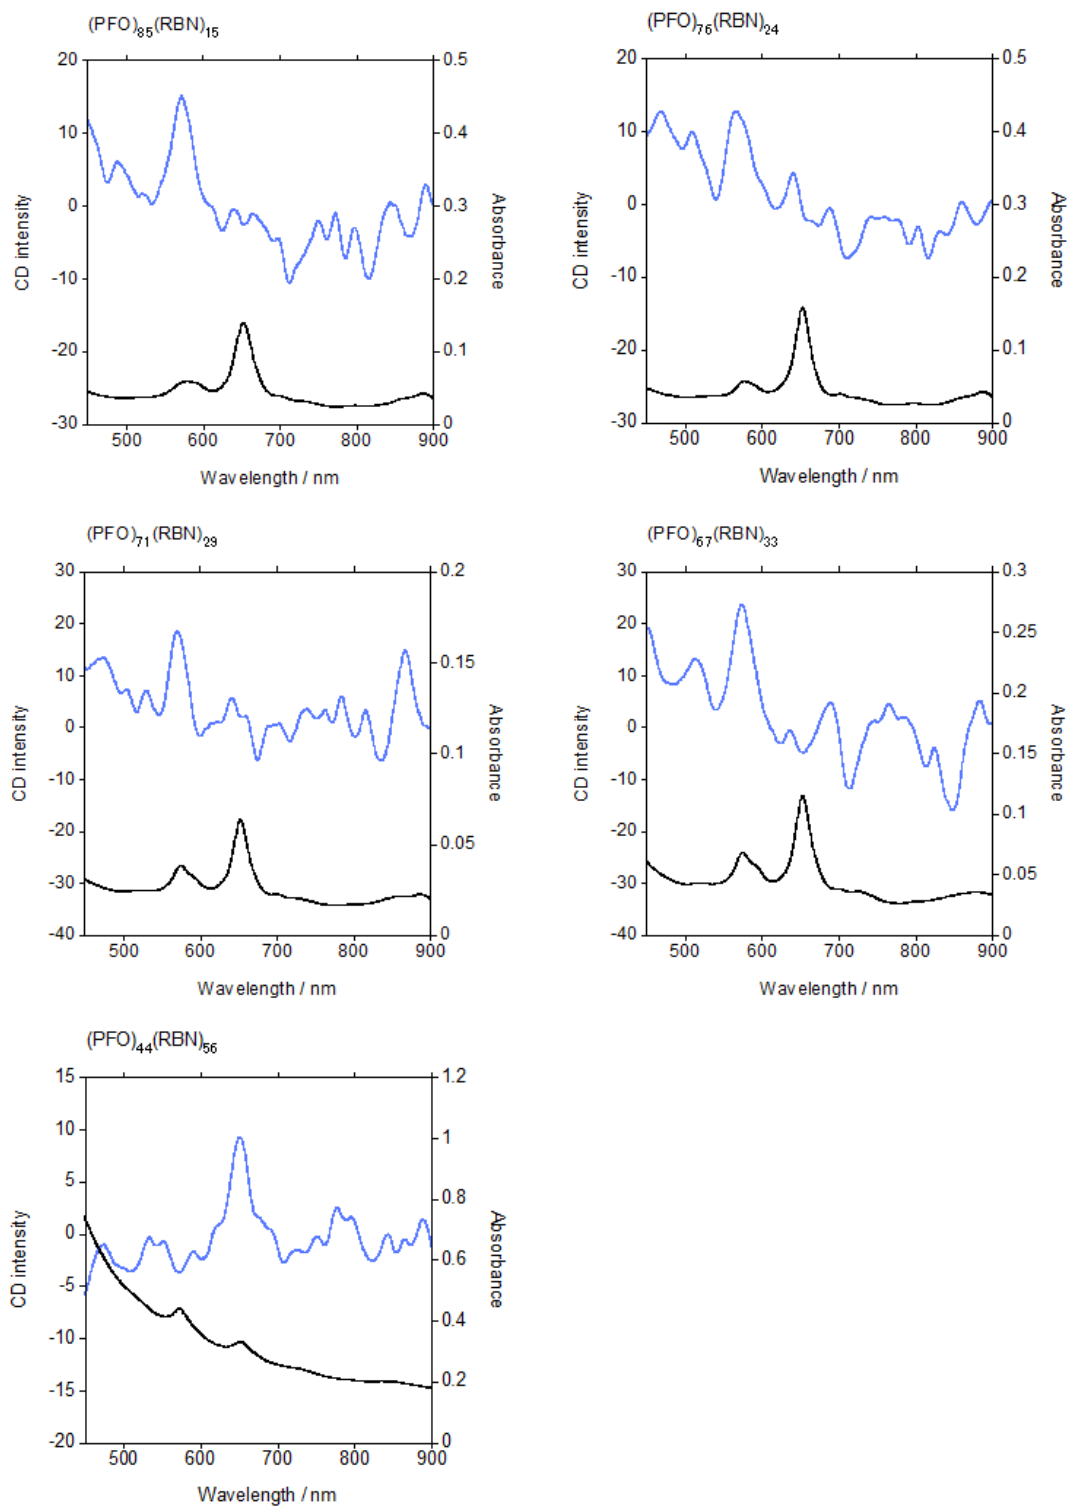

**Figure S5.** Visible absorption (black lines) and CD (blue lines) spectra of SWNTs extracted with (PFO) $_x$ (RBN) $_y$  ( $x:y = 85:15, 76:24, 71:29, 67:33$  and  $44:56$ ). The CD spectra are normalized based on the absorbance intensity of the SWNTs at 574 nm.

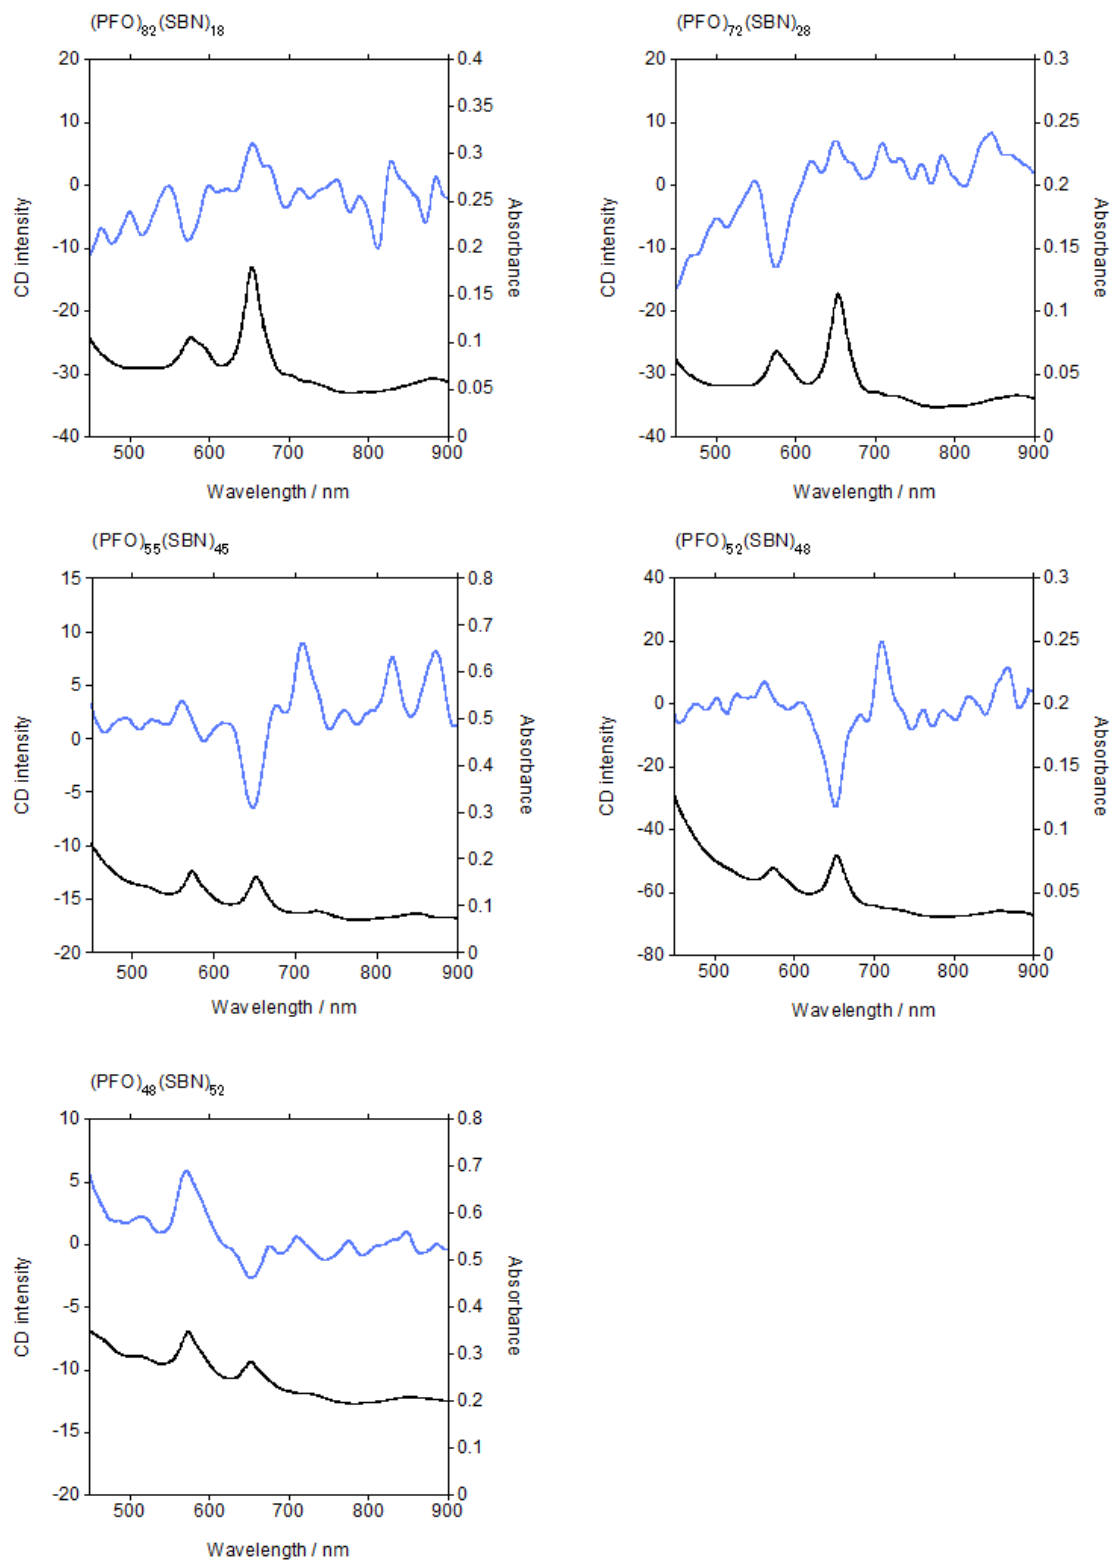

**Figure S6.** Visible absorption (black lines) and CD (blue lines) spectra of SWNTs extracted by (PFO) $_x$ (SBN) $_y$  ( $x$ :  $y$ = 82: 18, 72: 28, 55 : 45, 52: 48 and 48: 52). The CD spectra are normalized based on the absorbance intensity of the SWNTs at 574 nm.

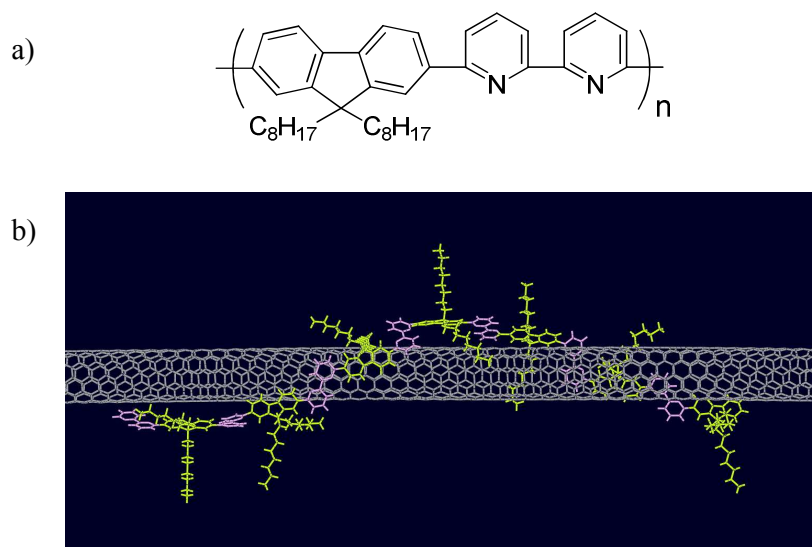

**Figure S7.** a) Chemical structure of PFO-BPy b) optimized calculated structure of complex of PFO-BPy and (6,5)SWNT.



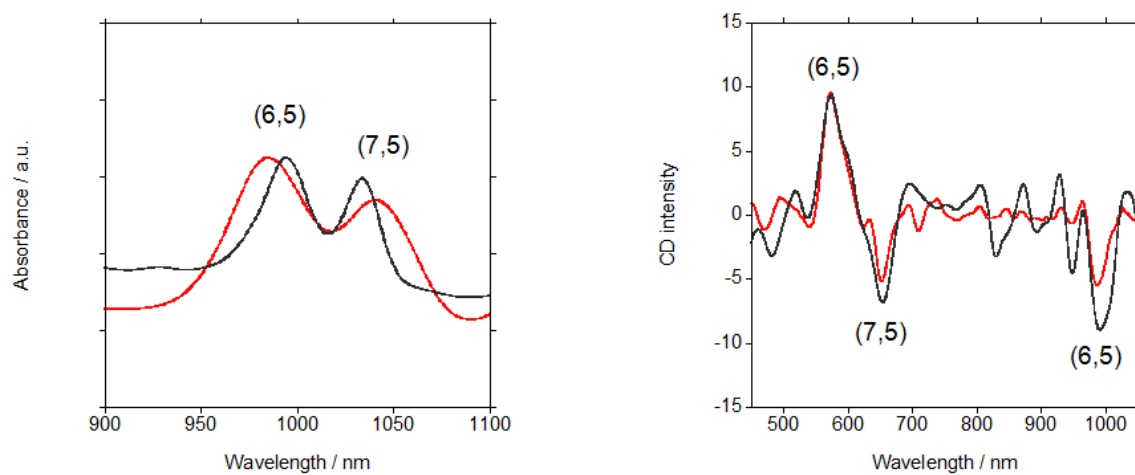

**Figure S8.** Near-IR absorption (left) and CD (right) spectra of the SWNTs extracted by  $(\text{PFO})_{61}(\text{RBN})_{39}$  before (red lines) and after (black lines) the addition of PFO-BPy. The absorption spectra are normalized at their maximum absorption wavelength. The CD spectra are normalized based on the absorbance intensity of the SWNTs at 574 nm.

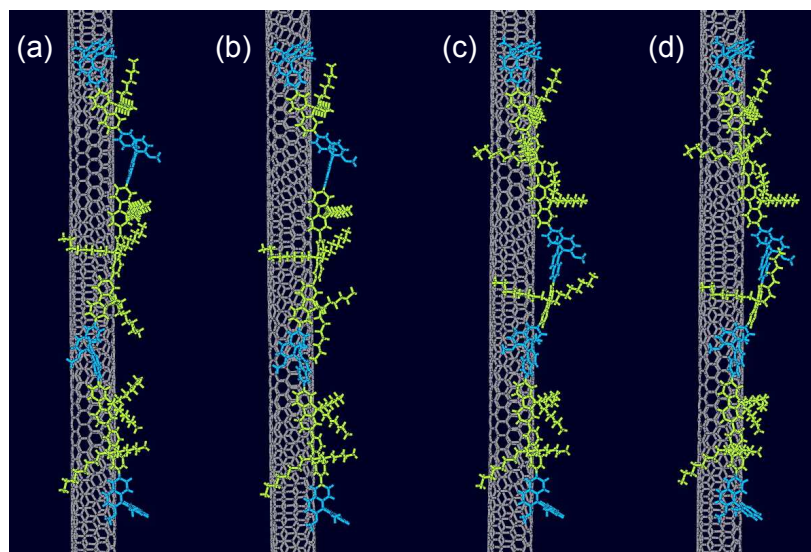

**Figure S9.** Modeled structures of left-handed SWNT with  $(\text{PFO})_{60}(\text{RBN})_{40-2}$  (a), right-handed SWNT with  $(\text{PFO})_{60}(\text{SBN})_{40-2}$  (b), left-handed SWNT with  $(\text{PFO})_{60}(\text{RBN})_{40-3}$  (c), and right-handed SWNT with  $(\text{PFO})_{60}(\text{SBN})_{40-3}$  (d).

**Table S1. Calculated Potential and Binding Energies Between (6,5)SWNT Enantiomers with PFO-BPy.**

| (6,5)SWNTs  | potential energy of                             | potential energy of                                | total potential                                                      | potential energy                                   | binding energy                                                                            |
|-------------|-------------------------------------------------|----------------------------------------------------|----------------------------------------------------------------------|----------------------------------------------------|-------------------------------------------------------------------------------------------|
|             | SWNT                                            | PFO-BPy                                            | energy                                                               | of complex                                         | $E_{\text{bind}} =$                                                                       |
|             | $(E_{\text{SWNT}})$<br>/ kcal mol <sup>-1</sup> | $(E_{\text{polymer}})$<br>/ kcal mol <sup>-1</sup> | $(E_{\text{polymer}} + E_{\text{SWNT}})$<br>/ kcal mol <sup>-1</sup> | $(E_{\text{complex}})$<br>/ kcal mol <sup>-1</sup> | $E_{\text{complex}} - (E_{\text{polymer}} + E_{\text{SWNT}})$<br>/ kcal mol <sup>-1</sup> |
| Left-handed | 88163                                           | 491                                                | 88654                                                                | 87795                                              | -859                                                                                      |

**Table S2. Calculated Potential and Binding Energies Between (6,5)SWNT Enantiomers with (PFO)<sub>60</sub>(RBN)<sub>40-2</sub>.**

| (6,5)SWNTs   | potential energy of                             | potential energy of                                | total potential                                                      | potential energy                                   | binding energy                                                                            |
|--------------|-------------------------------------------------|----------------------------------------------------|----------------------------------------------------------------------|----------------------------------------------------|-------------------------------------------------------------------------------------------|
|              | SWNT                                            | (PFO) <sub>60</sub> (RBN) <sub>40-2</sub>          | energy                                                               | of complex                                         | $E_{\text{bind}} =$                                                                       |
|              | $(E_{\text{SWNT}})$<br>/ kcal mol <sup>-1</sup> | $(E_{\text{polymer}})$<br>/ kcal mol <sup>-1</sup> | $(E_{\text{polymer}} + E_{\text{SWNT}})$<br>/ kcal mol <sup>-1</sup> | $(E_{\text{complex}})$<br>/ kcal mol <sup>-1</sup> | $E_{\text{complex}} - (E_{\text{polymer}} + E_{\text{SWNT}})$<br>/ kcal mol <sup>-1</sup> |
| Left-handed  | 88163                                           | 1380                                               | 89543                                                                | 88953                                              | -590                                                                                      |
| Right-handed | 88163                                           | 1380                                               | 89543                                                                | 88961                                              | -582                                                                                      |

**Table S3. Calculated Potential and Binding Energies Between (6,5)SWNT Enantiomers with (PFO)<sub>60</sub>(RBN)<sub>40-3</sub>.**

| (6,5)SWNTs   | potential energy of                             | potential energy of                                | total potential                                                      | potential energy                                   | binding energy                                                                            |
|--------------|-------------------------------------------------|----------------------------------------------------|----------------------------------------------------------------------|----------------------------------------------------|-------------------------------------------------------------------------------------------|
|              | SWNT                                            | (PFO) <sub>60</sub> (RBN) <sub>40-3</sub>          | energy                                                               | of complex                                         | $E_{\text{bind}} =$                                                                       |
|              | $(E_{\text{SWNT}})$<br>/ kcal mol <sup>-1</sup> | $(E_{\text{polymer}})$<br>/ kcal mol <sup>-1</sup> | $(E_{\text{polymer}} + E_{\text{SWNT}})$<br>/ kcal mol <sup>-1</sup> | $(E_{\text{complex}})$<br>/ kcal mol <sup>-1</sup> | $E_{\text{complex}} - (E_{\text{polymer}} + E_{\text{SWNT}})$<br>/ kcal mol <sup>-1</sup> |
| Left-handed  | 88163                                           | 1414                                               | 89577                                                                | 88953                                              | -624                                                                                      |
| Right-handed | 88163                                           | 1414                                               | 89577                                                                | 88956                                              | -621                                                                                      |
